# Supplementary material for: Identification of a Five-MiRNA Expression Assay to Aid Colorectal Cancer Diagnosis
Source: MDPI journal article supplement (doi:10.3390/gidisord4030018), 2022-08-19
Supplement: s1 [file s1]

# **Identification of a Five MiRNA Expression Assay to Aid Colorectal Cancer Diagnosis**

Matthew G. Davey MCh MRCS<sup>1</sup>, Gerard Feeney MCh MRCS<sup>1</sup>, Heidi Annuk PhD<sup>1</sup>,  
Maxwell Paganga BSci<sup>2</sup>, Emma Holian PhD<sup>2</sup>, Aoife J. Lowery PhD FRCS<sup>1</sup>,  
Michael J. Kerin MCh FRCS<sup>1</sup>, Nicola Miller PhD<sup>1</sup>

<sup>1</sup>Department of Surgery, Lambe Institute for Translational Research, National University of  
Ireland, Galway, Galway, Republic of Ireland.

<sup>2</sup> School of Mathematical and Statistical Sciences, National University of Ireland, Galway,  
Galway, Republic of Ireland.

**SUPPLEMENTARY MATERIAL**

**Table S1.** Details of the microRNA probes procured for this analysis.

| MiRNA Target | Probe (Taqman© assay ID) |
|--------------|--------------------------|
| miR-16       | 000391                   |
| miR-21       | 000397                   |
| miR-31       | 002279                   |
| miR-135b     | 002261                   |
| miR-150      | 002637                   |
| miR-155      | 002623                   |
| miR-195      | 000494                   |
| miR-345      | 002186                   |

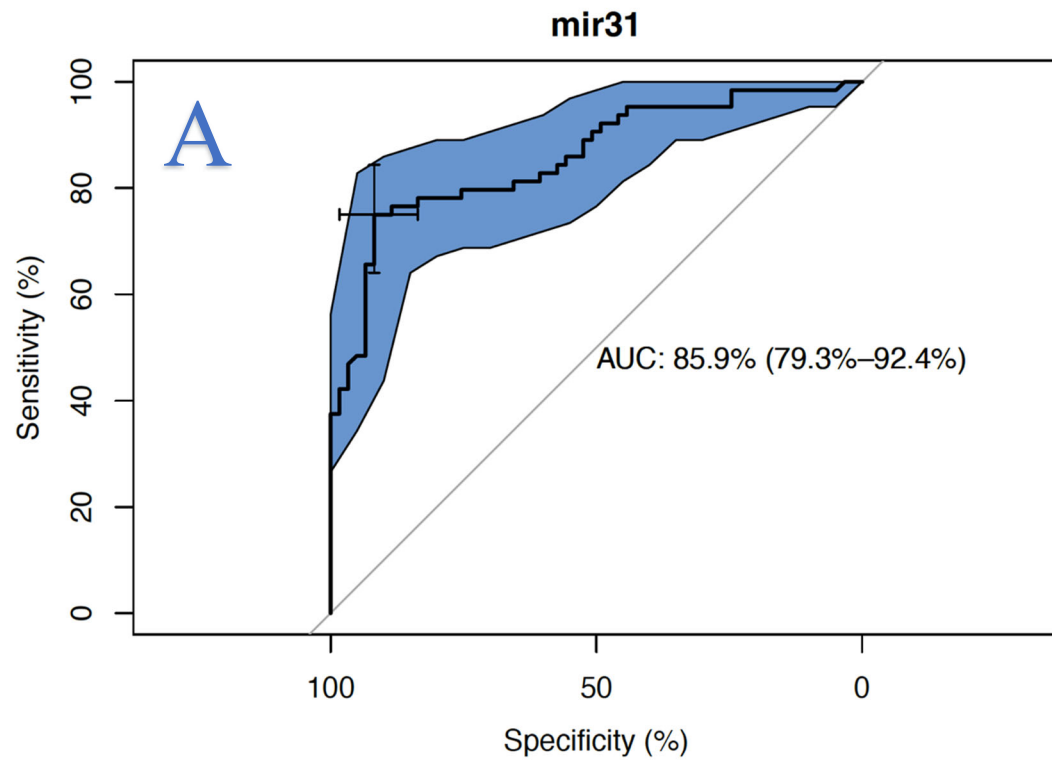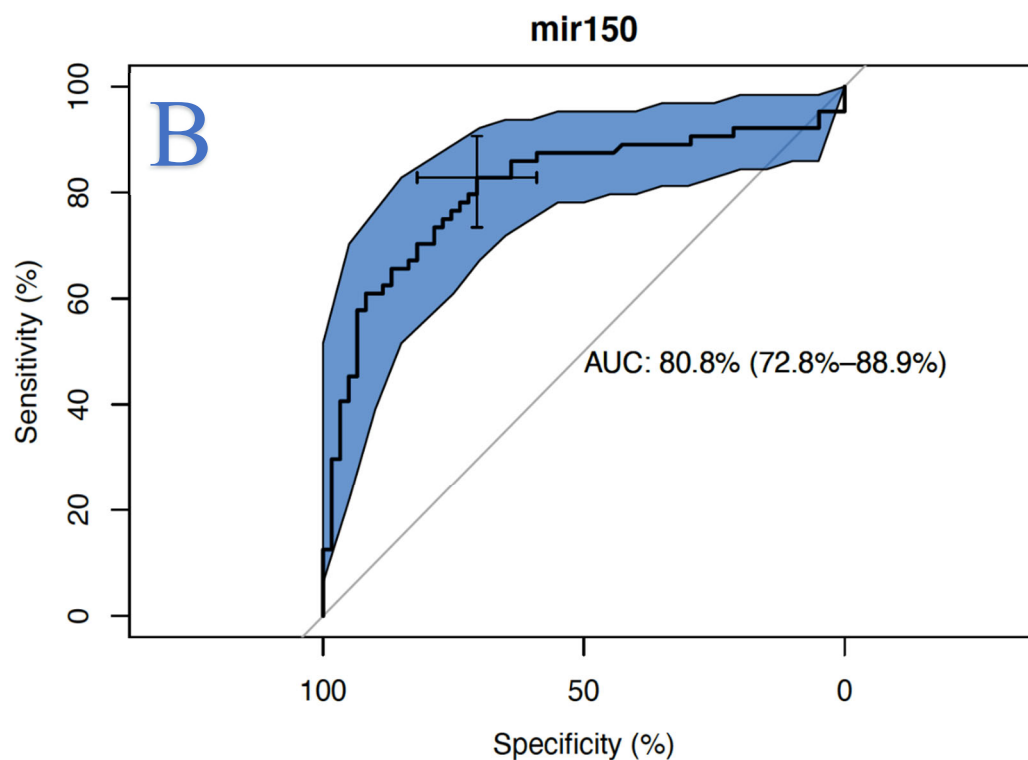

**Figure S1.** Receiver Operating Characteristic curves for (A) miR-31 and (B) miR-150 in differentiating tumour from tumour-associated normal tissues.
